# Supplementary material
Source: publisher figshare collection journal article supplement (https://acs.figshare.com/ndownloader/files/15606128)
Supplement: Supplementary file 1 [file 15606128]

1 *Supplementary Information for:*

2 **Springtime Nitrogen Oxide-Influenced Chlorine Chemistry in the Coastal Arctic**

3  
4 Stephen M. McNamara<sup>1</sup>, Angela R. W. Raso<sup>1,2§</sup>, Siyuan Wang<sup>1†</sup>, Sham Thanekar<sup>3</sup>, Eric Boone<sup>1,2</sup>,  
5 Katheryn R. Kolesar<sup>1◇</sup>, Peter K. Peterson<sup>1#</sup>, William R. Simpson<sup>4</sup>, Jose D. Fuentes<sup>3</sup>, Paul B.  
6 Shepson<sup>2,5‡</sup>, Kerri A. Pratt<sup>1,6\*</sup>

7  
8 <sup>1</sup>Department of Chemistry, University of Michigan, Ann Arbor, MI, USA

9 <sup>2</sup>Department of Chemistry, Purdue University, West Lafayette, IN, USA

10 <sup>3</sup>Department of Meteorology, Pennsylvania State University, University Park, PA, USA

11 <sup>4</sup>Department of Chemistry and Biochemistry, University of Alaska Fairbanks, Fairbanks, AK,  
12 USA

13 <sup>5</sup>Department of Earth, Atmospheric, and Planetary Sciences & Purdue Climate Change Research  
14 Center, Purdue University, West Lafayette, IN, USA

15 <sup>6</sup>Department of Earth and Environmental Sciences, University of Michigan, Ann Arbor, MI, USA

16 <sup>§</sup>Now at the New Mexico Environment Department, Santa Fe, NM, USA

17 <sup>†</sup>Now at the National Center for Atmospheric Research, Boulder, CO, USA

18 <sup>◇</sup>Now at Air Sciences Inc., Portland, OR, USA

19 <sup>#</sup>Now at the Department of Chemistry, Whittier College, Whittier, CA, USA

20 <sup>‡</sup>Now at the School of Marine & Atmospheric Sciences, Stony Brook University, Stony Brook,  
21 NY, USA

22  
23 \*Corresponding Author: Kerri A. Pratt

24 Department of Chemistry, University of Michigan

25 930 N. University Ave.

26 Ann Arbor, MI 48109

27 [prattka@umich.edu](mailto:prattka@umich.edu)

28 (734) 763-2871

29

**Summary** (24 pages with 1 table, 2 text sections, and 13 figures)

- **Table S1:** Overview of CIMS, O<sub>3</sub>, and NO<sub>x</sub> measurements and figures of merit.
- **Figure S1:** CIMS reagent ion signal during ambient sampling.
- **Figure S2:** Isotopic ratio plots for Cl<sub>2</sub>, ClNO<sub>2</sub>, ClO, and BrCl (10 min averaged) for all days and polluted-only days.
- **Figure S3:** Representative mass spectra for Cl<sub>2</sub>, HO<sub>2</sub>NO<sub>2</sub>, ClNO<sub>2</sub>, N<sub>2</sub>O<sub>5</sub>, and BrCl.
- **Figure S4:** Performance of the CIMS glass wool background scrubber.
- **Figure S5:** Comparison of the N<sub>2</sub>O<sub>5</sub> mass scan and selected ion monitoring data.
- **Section S2:** Identification of halogen species using isotopic ratios.
- **Section S3:** Offline calibration procedures for ClNO<sub>2</sub>, N<sub>2</sub>O<sub>5</sub>, ClO, BrCl, HO<sub>2</sub>NO<sub>2</sub>, and HNO<sub>3</sub>.
- **Figure S6:** NO and NO<sub>2</sub> wind rose plots, and description of sampling sites.
- **Figure S7:** Representative HYSPLIT backward air mass trajectories and measurements of wind speed/direction to show influence from the North Slope of Alaska oilfields.
- **Figure S8:** Trace gas observations during the three polluted periods.
- **Figure S9:** Observations of relationship between Cl<sub>2</sub> and O<sub>3</sub>.
- **Figure S10:** Cl<sub>2</sub> mole ratios vs. NO mole ratios.
- **Figure S11:** Vertical potential temperature measurements from daily soundings at Utqiagvik.
- **Figure S12:** HNO<sub>3</sub> measurements from April 8-May 20, 2016.
- **Figure S13:** ClNO<sub>2</sub> and N<sub>2</sub>O<sub>5</sub> mole ratios, air temperature, and solar radiation measurements during the three polluted periods.

## S1. Chemical ionization mass spectrometer (CIMS) operation

**Table S1:** Overview of CIMS, O<sub>3</sub>, and NO<sub>x</sub> measurements and figures of merit

| CIMS-Specific Parameters                                    |                                                                                                                 |                                                |                          |                                        |                                                           |                                                               |
|-------------------------------------------------------------|-----------------------------------------------------------------------------------------------------------------|------------------------------------------------|--------------------------|----------------------------------------|-----------------------------------------------------------|---------------------------------------------------------------|
| Species                                                     | Ions Quantified (m/z) <sup>a</sup>                                                                              | 3σ LOD (ppt)                                   | 3σ LOD 10 min avg. (ppt) | Measurement Uncertainty % + LOD, (ppt) | In-field Sensitivity (Hz ppt <sup>-1</sup> ) <sup>b</sup> | Relative Sensitivity (to Cl <sub>2</sub> or Br <sub>2</sub> ) |
| ClO                                                         | <sup>35</sup> ClO <sup>-</sup><br>m/z 178                                                                       | 2                                              | 1                        | 47% + 2                                |                                                           | 0.3 ± 0.1 <sup>c</sup>                                        |
| HNO <sub>3</sub><br>(after Apr 8) <sup>f</sup>              | IHNO <sub>3</sub> <sup>-</sup><br>m/z 190                                                                       | 19                                             | 10                       | 30% + 19                               |                                                           | 3.8 ± 0.9 <sup>d</sup>                                        |
| Cl <sub>2</sub>                                             | <sup>35</sup> Cl <sup>37</sup> Cl <sup>-</sup><br>m/z 199                                                       | 0.8                                            | 0.5                      | 22% + 0.8                              | 14 – 22                                                   |                                                               |
| HO <sub>2</sub> NO <sub>2</sub>                             | IHO <sub>2</sub> NO <sub>2</sub> <sup>-</sup><br>m/z 206                                                        | 15                                             | 8                        | 30% + 15                               |                                                           | 0.025 ± 0.001 <sup>e</sup>                                    |
| ClNO <sub>2</sub>                                           | <sup>35</sup> ClNO <sub>2</sub> <sup>-</sup><br>m/z 208                                                         | 0.3                                            | 0.2                      | 22% + 0.3                              |                                                           | 5.6 ± 0.6 <sup>d</sup>                                        |
| N <sub>2</sub> O <sub>5</sub><br>(after May 8) <sup>g</sup> | IN <sub>2</sub> O <sub>5</sub> <sup>-</sup><br>m/z 235                                                          | 1                                              | 0.8                      | 24% + 1                                |                                                           | 1.3 ± 0.1 <sup>d</sup>                                        |
| BrCl                                                        | <sup>81</sup> Br <sup>35</sup> Cl <sup>-</sup><br>and <sup>79</sup> Br <sup>37</sup> Cl <sup>-</sup><br>m/z 243 | 3                                              | 2                        | 39% + 3                                |                                                           | 1.6 ± 0.5 <sup>d</sup>                                        |
| Br <sub>2</sub>                                             | <sup>79</sup> Br <sup>81</sup> Br <sup>-</sup><br>m/z 287                                                       | 1                                              | 0.8                      | 29% + 1                                | 36 – 67                                                   |                                                               |
| Additional Measurements                                     |                                                                                                                 |                                                |                          |                                        |                                                           |                                                               |
| Species                                                     | Instrument                                                                                                      | LOD                                            |                          | Dates available                        |                                                           |                                                               |
| O <sub>3</sub>                                              | 2B Instruments, Model 205                                                                                       | 1 ppb                                          |                          | Mar 4 – May 20                         |                                                           |                                                               |
| NO                                                          | Thermo Scientific, Model 42i                                                                                    | 0.4 ppb                                        |                          | Mar 11-20, Mar 25-Apr 2, May 11-19     |                                                           |                                                               |
| NO <sub>2</sub>                                             | MAX-DOAS <sup>ref 1–3</sup>                                                                                     | 2.5 x 10 <sup>15</sup> molec. cm <sup>-2</sup> |                          | Mar 4 – May 20                         |                                                           |                                                               |

<sup>a</sup>All dwell times were 500 ms except for IHNO<sub>3</sub><sup>-</sup> at m/z 190, which was 200 ms.

<sup>b</sup>Range is mean ± calculated uncertainty for the campaign.

<sup>c</sup>Relative to Cl<sub>2</sub> (m/z 197). <sup>d</sup>Relative to Cl<sub>2</sub> (m/z 199). <sup>e</sup>Relative to Br<sub>2</sub> (m/z 287).

<sup>f</sup>Due to high instrument backgrounds, only HNO<sub>3</sub> data from after Apr 8 are presented (**Figure S12**)

<sup>g</sup>For N<sub>2</sub>O<sub>5</sub> quantified by hourly mass scans (Mar 4 – May 8), the LOD was estimated as 12 ppt.

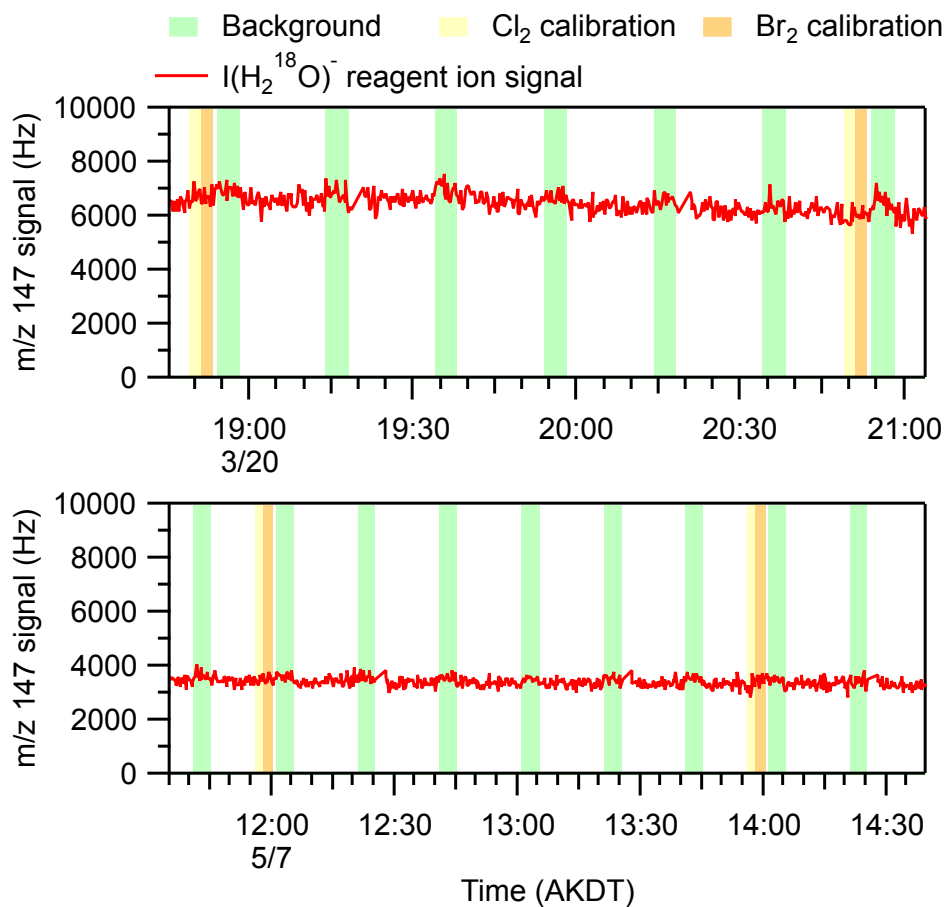

62

63 **Figure S1:** Reagent ion signal, monitored at  $m/z$  147 as  $\text{I}(\text{H}_2^{18}\text{O})^-$ , during ambient sampling,  
 64 backgrounds, and calibrations at two example periods during the campaign.

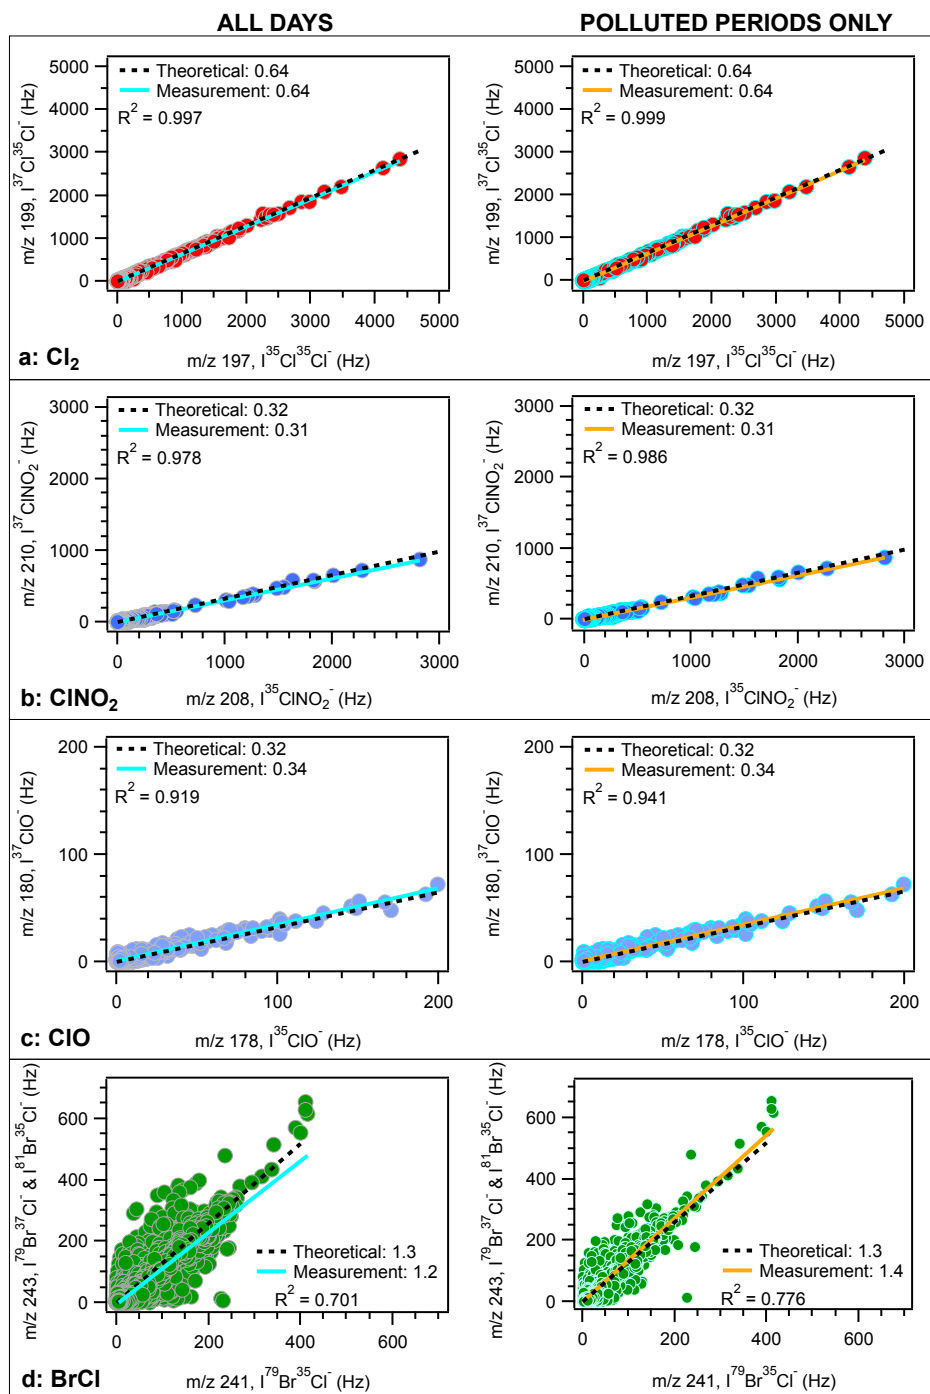

65

66 **Figure S2:** 10 min averaged measured signals (background subtracted) of (A)  $m/z\ 199$  vs  $m/z\ 197$ ,  
 67 (B)  $m/z\ 210$  vs  $m/z\ 208$ , (C)  $m/z\ 180$  vs  $m/z\ 178$ , and (D)  $m/z\ 243$  vs  $m/z\ 241$  showing isotopic  
 68 ratios used to identify  $\text{Cl}_2$ ,  $\text{ClNO}_2$ ,  $\text{ClO}$ , and  $\text{BrCl}$ , respectively, from March 4 – May 20, 2016 (*left*  
 69 *column*) and during the three polluted periods only (*right column*). The black dashed lines are the

S5

70 theoretical isotopic ratios and the solid lines are the measured ratios. For ClO in (C), all data  
71 observed to be impacted by a mass interference at  $m/z$  180 are not included here.

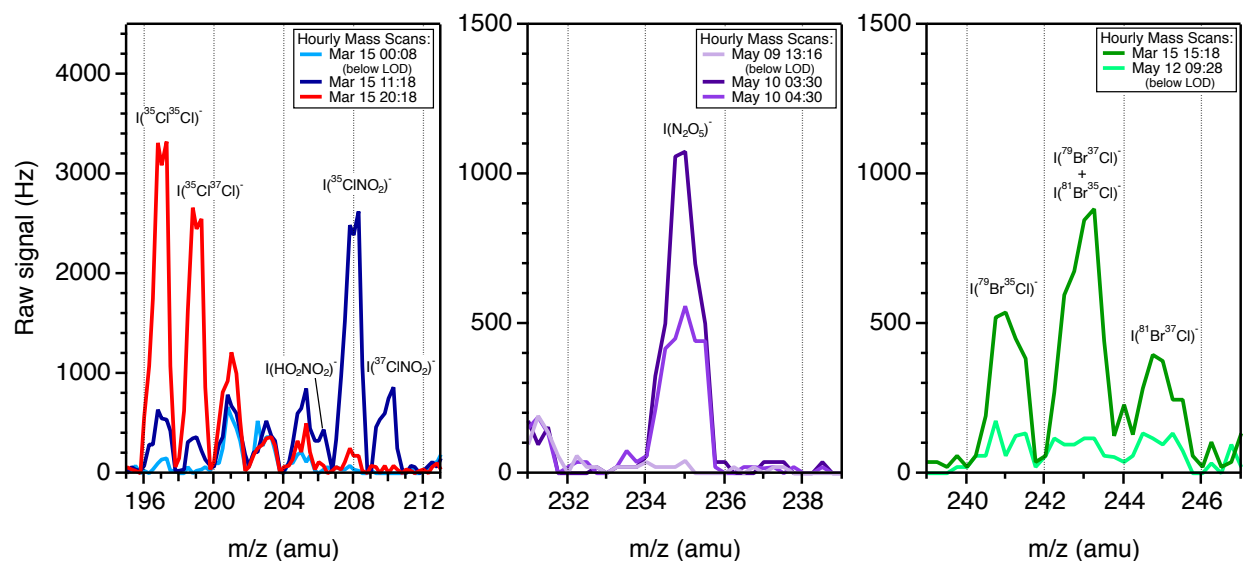

**Figure S3:** Representative mass spectra (at  $m/z$  195-213,  $m/z$  231-239, and  $m/z$  239-247) comparing when  $\text{Cl}_2$ ,  $\text{HO}_2\text{NO}_2$ ,  $\text{ClNO}_2$ ,  $\text{N}_2\text{O}_5$ , and  $\text{BrCl}$  were abundant versus times when signals were below detection limits (noted as “(below LOD)” in plot legends). All mass scans used a 0.25 amu step size and 100 ms dwell time.

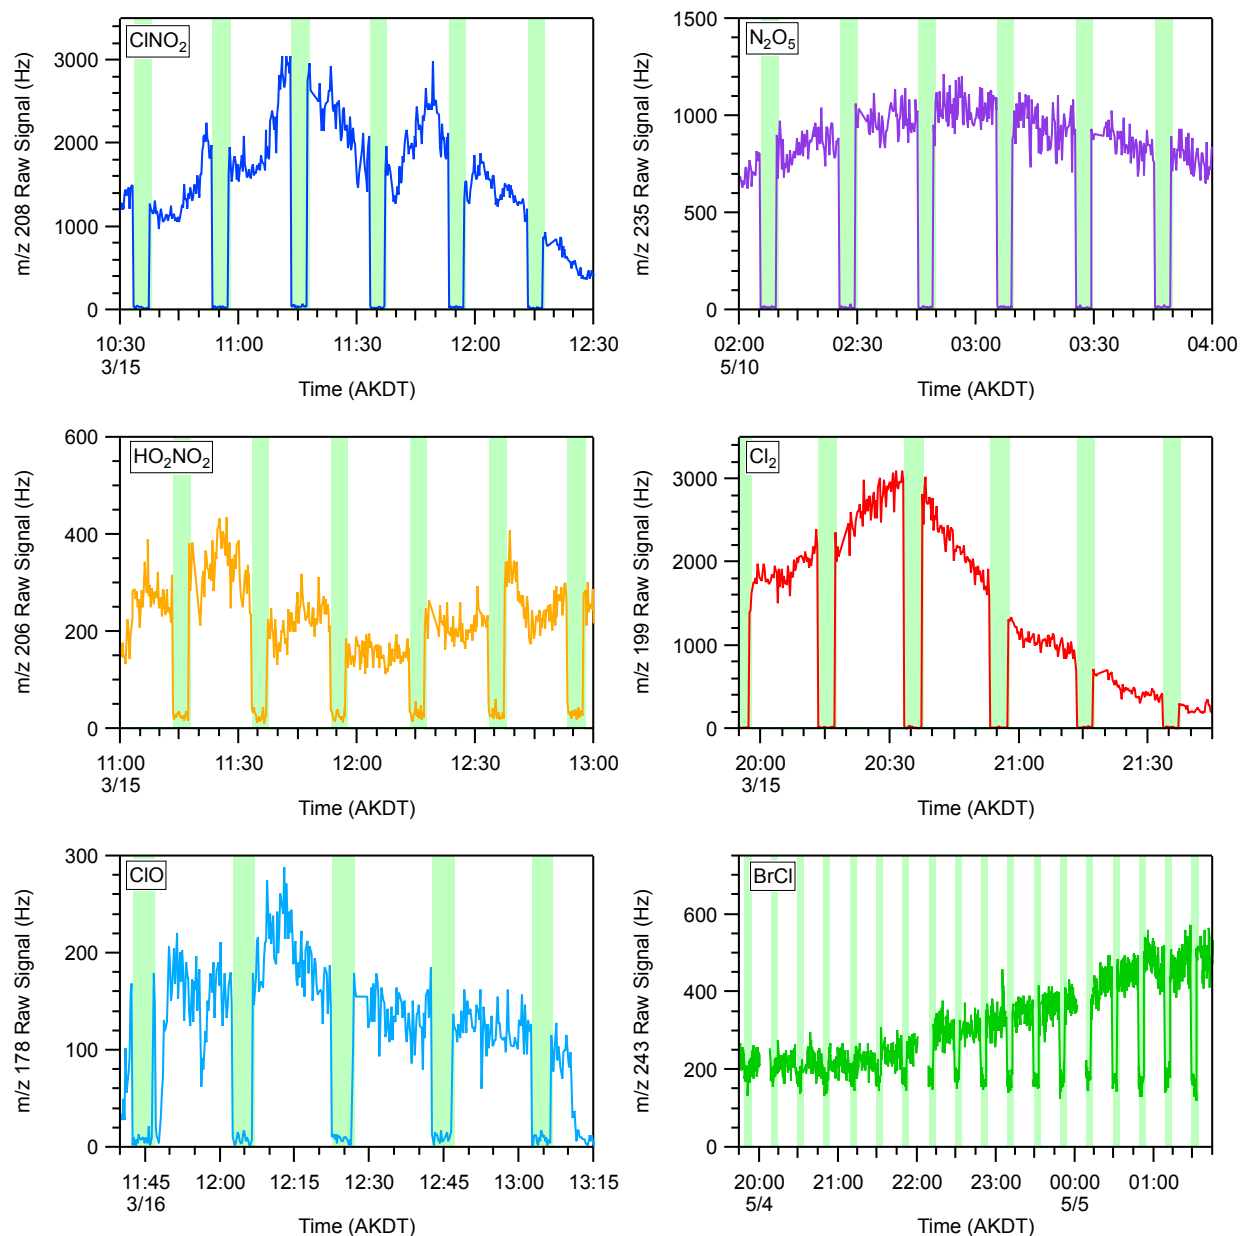

78

79 **Figure S4:** Performance of the glass wool scrubber during high-abundance periods of CINO<sub>2</sub>,  
 80 N<sub>2</sub>O<sub>5</sub>, HO<sub>2</sub>NO<sub>2</sub>, Cl<sub>2</sub>, ClO, and BrCl, with background periods shown by green shading. A constant  
 81 interference was present from  $m/z$  241 –  $m/z$  245 that was not removed by the scrubber, leading to  
 82 the elevated signal during backgrounds for BrCl. However, these background signals were not



83 consistent with BrCl isotopic ratios and therefore did not impact the scrubber's ability to remove  
84 BrCl.

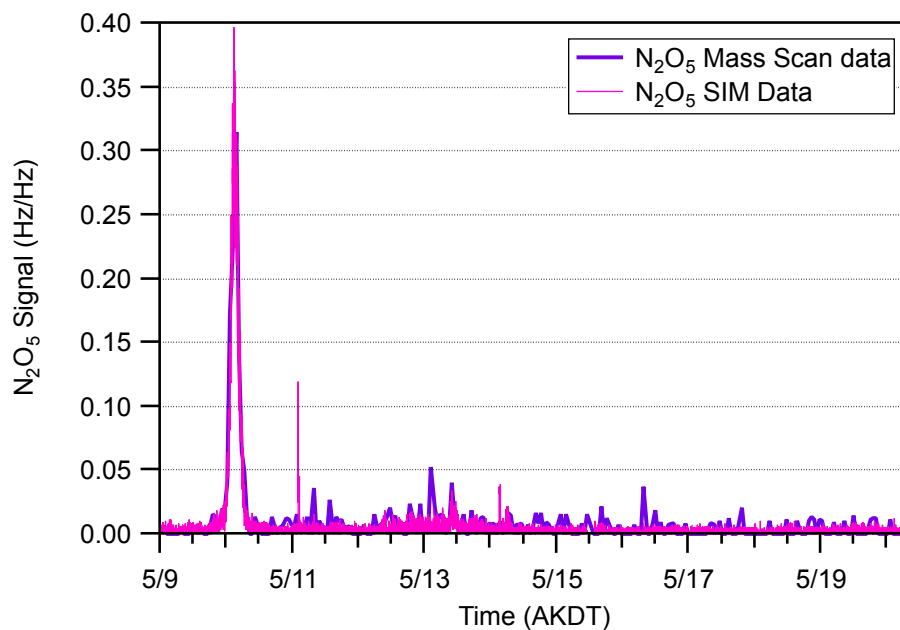

**Figure S5:** Comparison of  $\text{N}_2\text{O}_5$  mass scan and selected ion monitoring (SIM) data, during the period of overlap from May 9-20, 2016. The estimated  $\text{N}_2\text{O}_5$  mass scan LOD of 12 ppt was estimated using the SIM background period (4 min, LOD = 1 ppt), while accounting for the shortened mass scan dwell time (100 ms). Since the signal variation is assumed to be dominated by counting statistics,<sup>4</sup> we account for the difference in dwell times by taking the square root of this factor (the 100 ms mass scan is a factor of 80 shorter than the total dwell time during the 4 minute SIM background period) to estimate the mass scan LOD.

## S2. Identification of halogen species using isotopic ratios

The measured isotopic ratios of the halogen species were used to confirm their identities. Signals of two isotopes for the same species (e.g.,  $\text{I}^{35}\text{Cl}^{37}\text{Cl}^-$  vs.  $\text{I}^{35}\text{Cl}^{35}\text{Cl}^-$  for  $\text{Cl}_2$ ), averaged to 10 minutes, were plotted against each other and the slope of a linear regression was compared to the theoretical isotopic ratio (**Figure S2**). We report the following measured ratios, in comparison to the theoretical ratios, for all days of the campaign: For  $m/z$  199 vs  $m/z$  197, the measured ratio of 0.64 ( $R^2 = 0.997$ ) confirmed the identity of  $\text{Cl}_2$  (theoretical = 0.64). For  $m/z$  210 vs  $m/z$  208, the measured ratio of 0.31 ( $R^2 = 0.978$ ) confirmed the identity of  $\text{ClNO}_2$  (theoretical = 0.32). For  $m/z$  180 vs  $m/z$  178, the measured ratio of 0.34 ( $R^2 = 0.919$ ) confirmed the identity of  $\text{ClO}$  (theoretical = 0.32). A mass interference at  $m/z$  180 ( $\text{I}^{37}\text{ClO}^-$ ) was observed, which resulted in  $\text{ClO}$  not being quantifiable from March 25 – April 30, when the ratio of  $m/z$  180 to  $m/z$  178 ( $\text{I}^{35}\text{ClO}^-$ ) varied by >30%. For  $m/z$  243 vs  $m/z$  241, the measured ratio of 1.2 ( $R^2 = 0.701$ ) confirmed the identity of  $\text{BrCl}$  (theoretical = 1.3).

### S3. Offline calibrations of ClNO<sub>2</sub>, N<sub>2</sub>O<sub>5</sub>, ClO, BrCl, HO<sub>2</sub>NO<sub>2</sub>, and HNO<sub>3</sub>

#### S3.1. ClNO<sub>2</sub>

Nitryl chloride (ClNO<sub>2</sub>) was calibrated using a modified procedure of *Thaler et al.*<sup>5</sup> In the laboratory, ClNO<sub>2</sub> was synthesized by passing 0 – 50 ppb Cl<sub>2</sub> over a 1.0 mL bed of 0.01 M NaNO<sub>2</sub> solution. The synthesized ClNO<sub>2</sub> was then passed through a 300°C quartz tube oven, where it was completely thermally dissociated (complete loss of ClNO<sub>2</sub> signal at *m/z* 208 and 210). The resulting NO<sub>2</sub> was quantified using a custom NO<sub>x</sub> analyzer<sup>6</sup> equipped with a blue light-emitting diode to photochemically reduce NO<sub>2</sub> to NO for measurement.<sup>7</sup> The ClNO<sub>2</sub> sensitivity (at *m/z* 208) relative to Cl<sub>2</sub> (at *m/z* 199) was determined to be  $5.6 \pm 0.6$ .

#### S3.2. N<sub>2</sub>O<sub>5</sub>

Dinitrogen pentoxide (N<sub>2</sub>O<sub>5</sub>) was calibrated using a modified procedure of *Bertram et al.*<sup>8</sup> N<sub>2</sub>O<sub>5</sub> was synthesized by combining flows of NO<sub>2</sub> and O<sub>3</sub> in a 61 cm long, 2.2 cm diameter PFA tube with a 1.5 min residence time (flow rate of 2.7 cm<sup>3</sup> s<sup>-1</sup>). N<sub>2</sub>O<sub>5</sub> was quantified using the custom NO<sub>x</sub> analyzer described in Section S3.1<sup>6,7</sup> by measuring the amount of NO<sub>2</sub> reacted upon the addition of O<sub>3</sub>, assuming two moles of NO<sub>2</sub> are reacted to form one mole of N<sub>2</sub>O<sub>5</sub> (R7-R8). Loss of NO<sub>2</sub> due to excess NO<sub>3</sub> formation was negligible. For NO<sub>2</sub> at 40 ppb within the PFA tube during the calibration, the [NO<sub>3</sub>] / [N<sub>2</sub>O<sub>5</sub>] ratio was calculated to be 0.04. The N<sub>2</sub>O<sub>5</sub> sensitivity (at *m/z* 235) relative to Cl<sub>2</sub> (at *m/z* 199) was determined to be  $1.3 \pm 0.1$ .

#### S3.3. ClO

The relative sensitivity of  $0.3 \pm 0.1$  for chlorine monoxide (ClO) (*m/z* 178) / Cl<sub>2</sub> (*m/z* 197) determined by *Custard et al.*<sup>9</sup> was applied for the ambient measurements for this study. For this calibration, ClO was synthesized in a quartz flow tube via the photolysis of Cl<sub>2</sub> with excess O<sub>3</sub> (90

ppb) and ~5 ppb of NO<sub>2</sub>.<sup>9</sup> The steady-state ClO concentration was determined using the measured photolysis rate of Cl<sub>2</sub> and measurements of Cl<sub>2</sub> and NO<sub>2</sub> mole ratios.<sup>9</sup>

### S3.4. BrCl

Bromine chloride (BrCl) was synthesized by passing Cl<sub>2</sub> over a 1 mL bed of 1 M NaBr solution in a glass reaction vessel, similar to *Huff et al.*<sup>10</sup> The output of the reaction vessel was predominately BrCl, Br<sub>2</sub>, and the remaining Cl<sub>2</sub>, as measured by CIMS. It is likely the observed Br<sub>2</sub> was a product of a subsequent reaction of BrCl and bromide (Br<sup>-</sup>).<sup>10</sup> The reaction output was bubbled into 10 mL of sodium bicarbonate/sodium metabisulfite buffer solution in a glass impinger for 40 min, allowing the following reactions with the molecular halogens to occur (RS1 –RS3, where X = Cl or Br):

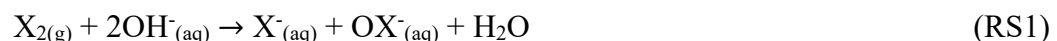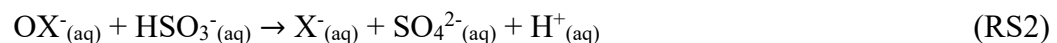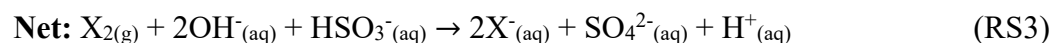

The total chloride concentration of the buffer solution following bubbling of the reaction output was measured using a Dionex ICS-2100 ion chromatograph. A blank solution (N<sub>2</sub> bubbled only) was also collected as a background measurement, and the background Cl<sup>-</sup> (accounting for ~4-10%) was subtracted from the total measured Cl<sup>-</sup> in the reaction output solution. Following the background subtraction, the Cl<sup>-</sup> resulting from the remaining Cl<sub>2</sub> was subtracted from the total measured Cl<sup>-</sup> using the Cl<sub>2</sub> signal measured by CIMS in parallel. The BrCl was then quantified as the remaining chloride in the solution following subtraction of the chloride from unreacted Cl<sub>2</sub> and the blank (background Cl<sup>-</sup>). The headspace of the impinger during the bubbling period was monitored with CIMS, and no Cl<sub>2</sub>, BrCl, or Br<sub>2</sub> was observed; therefore, the output of the reaction

vessel was sufficiently captured by the buffer solution. The resulting BrCl sensitivity (at  $m/z$  243) relative to Cl<sub>2</sub> (at  $m/z$  199) was determined to be  $1.6 \pm 0.5$ .

### S3.5. HO<sub>2</sub>NO<sub>2</sub>

Peroxynitric acid (HO<sub>2</sub>NO<sub>2</sub>) was synthesized following *Appelman and Gosztola*<sup>11</sup> and was obtained in the gas-phase by bubbling N<sub>2</sub> through an impinger containing the synthesized peroxynitric acid in a solution of hydrogen peroxide on ice. The HO<sub>2</sub>NO<sub>2</sub> was quantified using the NO<sub>2</sub> generated from its thermal decomposition at 140°C within a 91 cm Teflon tube, and it was assumed that the thermal decomposition of each HO<sub>2</sub>NO<sub>2</sub> molecule led to the formation of one NO<sub>2</sub> molecule. The NO<sub>2</sub> was monitored using a custom chemiluminescence NO<sub>y</sub> instrument, constructed following previous methods<sup>12–14</sup> and calibrated using a NO<sub>2</sub> standard cylinder (Praxair).

### S3.6. HNO<sub>3</sub>

Nitric acid (HNO<sub>3</sub>) was calibrated in the laboratory by adding to the CIMS inlet flow 0.2 L min<sup>-1</sup> of HNO<sub>3</sub> (in N<sub>2</sub>) from a 50 ng min<sup>-1</sup> HNO<sub>3</sub> permeation source (VICI Metronics, Inc.). The HNO<sub>3</sub> mole ratio was varied from 0.8 – 9.7 ppb to obtain a calibration curve. The HNO<sub>3</sub> permeation rate was confirmed by bubbling the HNO<sub>3</sub> flow into 4 mL of micropure water, and the resulting nitrate concentration was quantified using a Dionex ICS-2100 ion chromatograph. The HNO<sub>3</sub> sensitivity (at  $m/z$  190, IHNO<sub>3</sub><sup>-</sup>) relative to Cl<sub>2</sub> (at  $m/z$  199) was determined to be  $3.8 \pm 0.9$ .

169 **S4. Additional data figures**

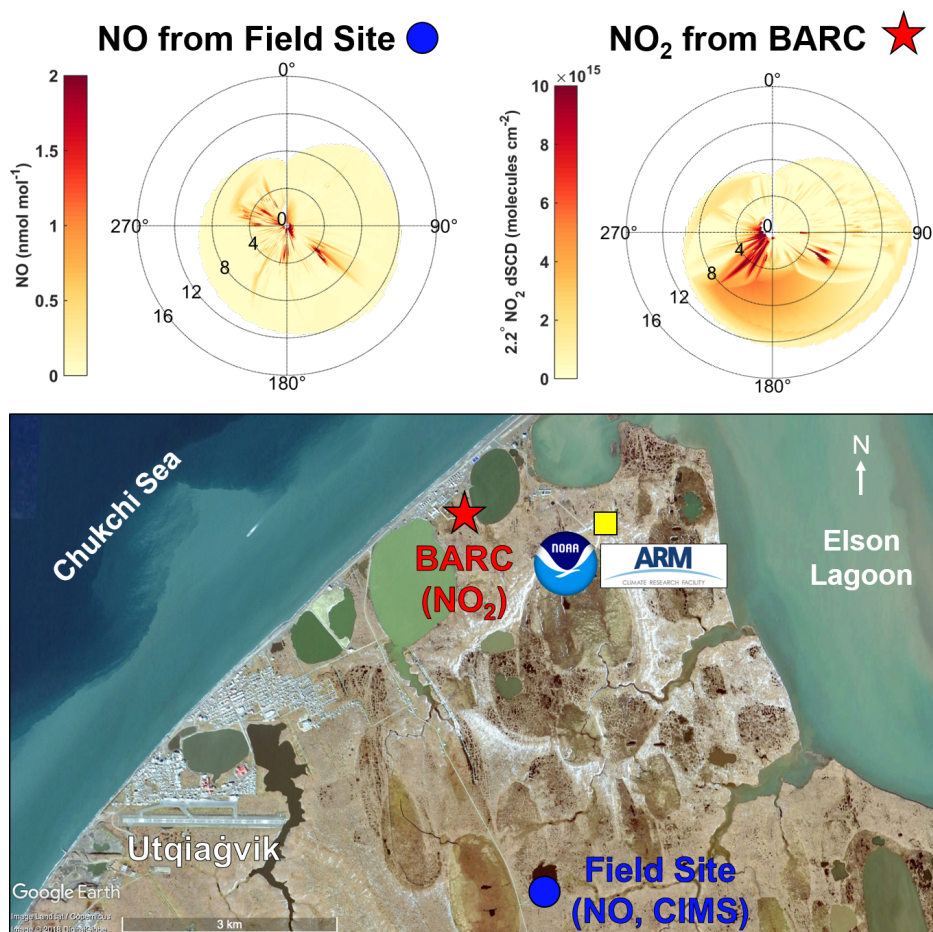

170  
171 **Figure S6:** Wind rose plots, colored by NO mole ratios (*top-left*) and NO<sub>2</sub> differential slant column  
172 densities (dSCDs, *top-right*) and a map of the region (*bottom*). *In situ* NO was measured at the  
173 main field site (blue circle), located ~5 km ESE of Utqiagvik, and NO<sub>2</sub> measured from the Barrow  
174 Arctic Research Center (BARC, red star), ~5 km NW of Utqiagvik. From March 4 – 17, wind  
175 direction (°) and wind speeds (m s<sup>-1</sup>) measured at the NOAA Barrow Observatory (yellow square),  
176 with wind measurements occurring at the main field site for the remainder of the study. The ARM  
177 Research Facility is located next to the NOAA Observatory (yellow square).

178

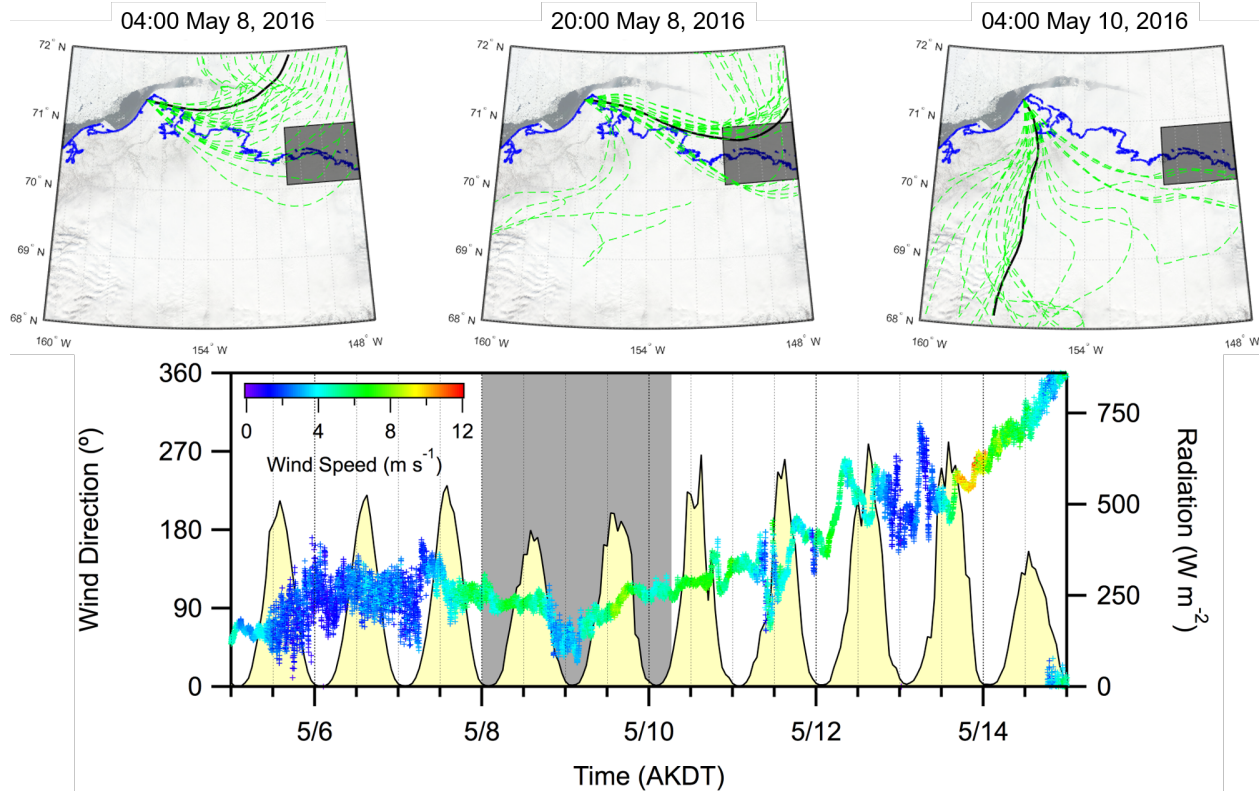

179

180 **Figure S7:** (*top panels*) Representative HYSPLIT 72-hour backward air mass trajectories (black  
 181 lines) arriving at Utqiagvik at 04:00 AKDT May 8 (*left*), 20:00 AKDT May 8 (*middle*), and 04:00  
 182 AKDT May 10 (*right*). Green dashed lines are ensemble members of the trajectories, which  
 183 represent uncertainty. Portions of the trajectories and ensemble members travel through the gray-  
 184 shaded region representing the North Slope of Alaska and Prudhoe Bay Oilfields.<sup>15</sup> For reference,  
 185 the full period of “Prudhoe Bay Influence”, defined as times when air mass trajectories traveled  
 186 through the gray-shaded region, was determined to be 00:00 AKDT May 8 to 05:00 AKDT May  
 187 10. (*lower panel*) Wind direction, wind speed, and solar radiation observations from May 5 – 15,  
 188 2016, with the gray shading representing the Prudhoe Bay-influenced period determined from the  
 189 HYSPLIT trajectories.



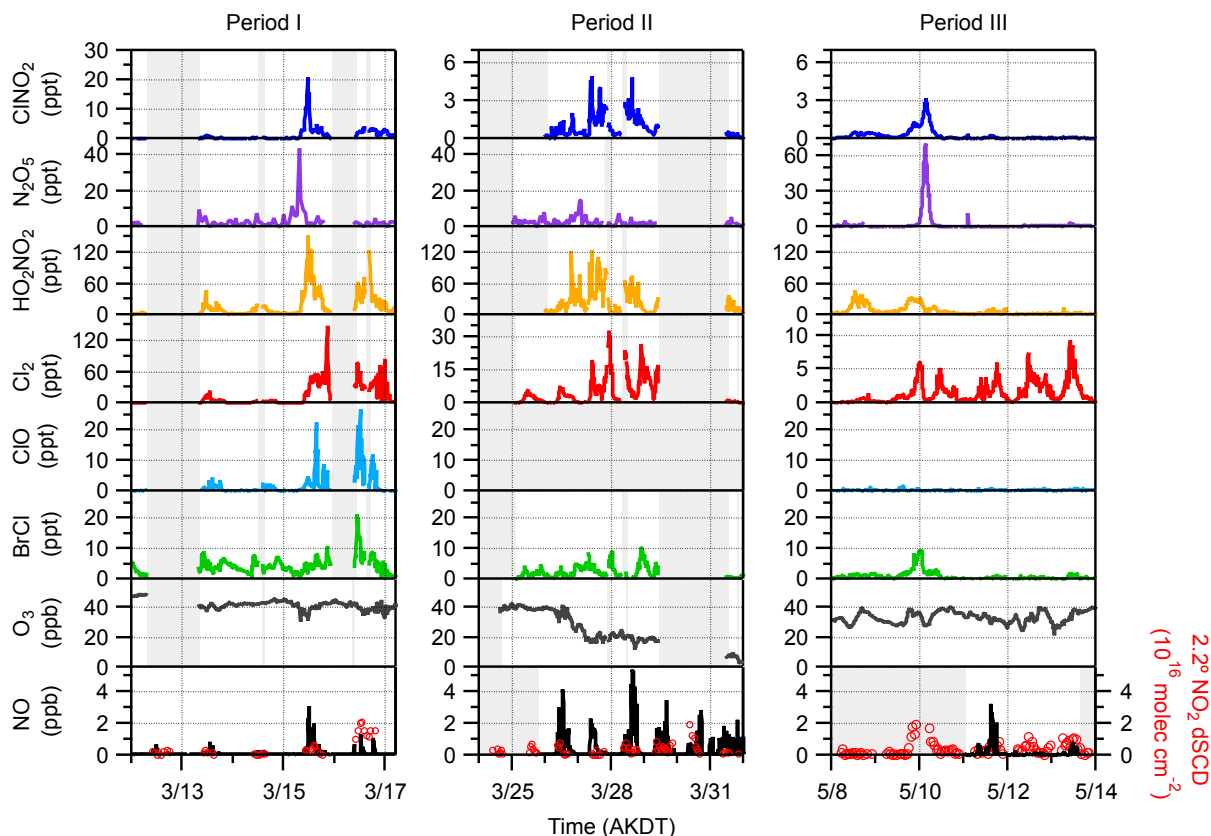

190

191 **Figure S8:** Observations of CINO<sub>2</sub>, N<sub>2</sub>O<sub>5</sub>, HO<sub>2</sub>NO<sub>2</sub>, Cl<sub>2</sub>, ClO, BrCl, O<sub>3</sub>, NO, and NO<sub>2</sub> during the

192 three episodes of enhanced chlorine chemistry (March 12-16, March 24-31, and May 8-13, 2016)

193 near Utqiagvik, AK. Gray shading denotes periods without CIMS, O<sub>3</sub>, or NO data available due to

194 site power loss and use for other experiments. During Period II, ClO could not be quantified due

195 to a mass interference.

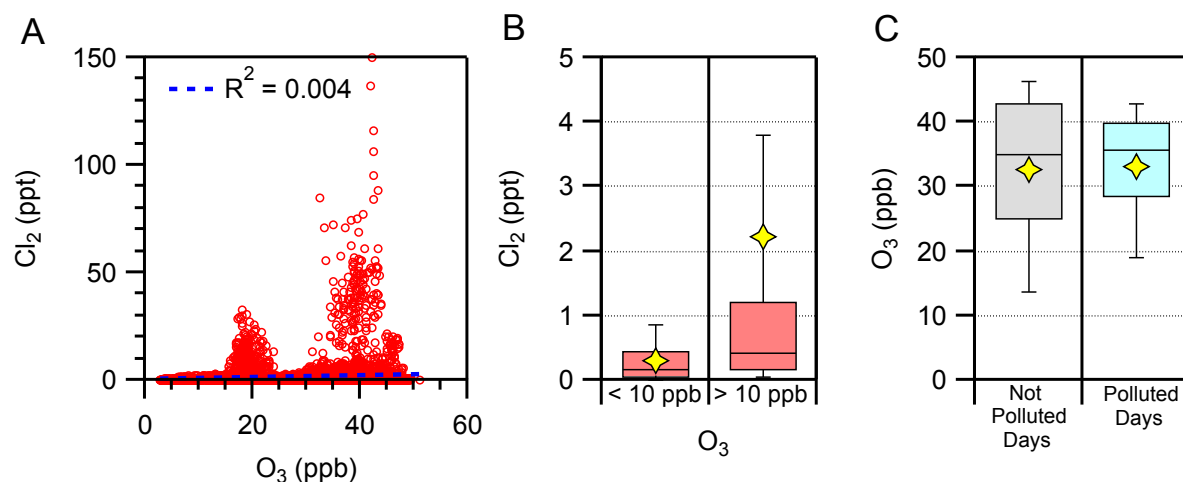

**Figure S9:** (A)  $\text{Cl}_2$  mole ratios vs  $\text{O}_3$  mole ratios (10 min averaged). Box and whisker plots show the distributions (90th/10th and 75th/25th percentiles, and medians) of (B)  $\text{Cl}_2$  mole ratios, binned by  $\text{O}_3$  mole ratios less or greater than 10 ppb, and (C)  $\text{O}_3$  mole ratios, binned by Not Polluted and Polluted days (defined in Section 2.2 and used in Figure 2B). Yellow stars represent average mole ratios for the given populations. Elevated  $\text{Cl}_2$  was observed when  $\text{O}_3$  was near background levels (typically  $> 20$  ppb), and  $\text{Cl}_2$  was near zero when  $\text{O}_3$  was depleted ( $< 10$  ppb), as observed previously.<sup>9,16</sup> Both Polluted and Not Polluted periods experienced nearly the same levels of  $\text{O}_3$ , on average, during the campaign, showing that the levels of  $\text{NO}_x$ , rather than  $\text{O}_3$  were likely responsible for the differences in  $\text{Cl}_2$  mole ratios observed.

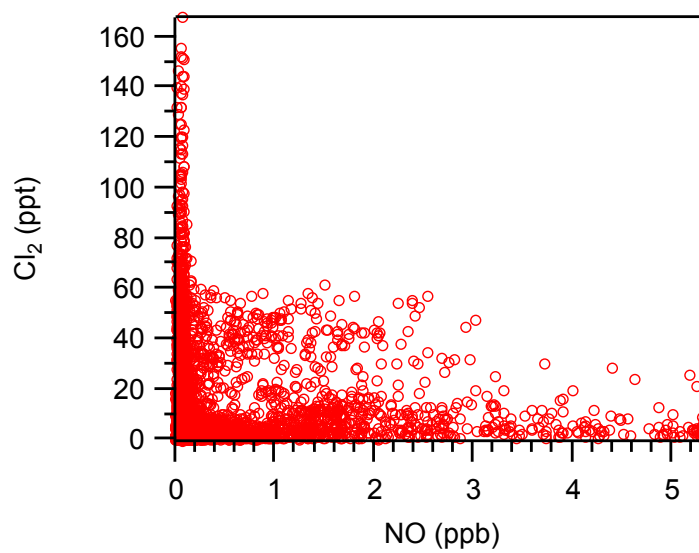

207

208 **Figure S10:** 1 min averaged  $\text{Cl}_2$  observations versus 1 min averaged NO observations ( $R^2 =$

209 0.004) during PHOXMELT. Note that the NO instrument LOD is 0.4 ppb.

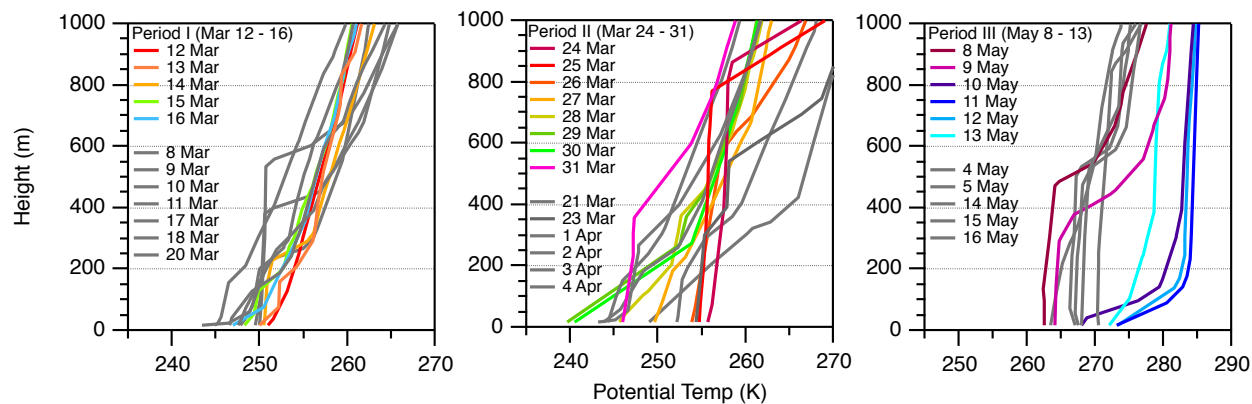

210  
 211 **Figure S11:** Vertical potential temperature measurements from daily soundings at the PABR  
 212 station in Utqiagvik. All times are 12:00 UTC (03:00 AKST). Soundings from the three polluted  
 213 periods are shown with colored traces, and soundings from the surrounding days are shown with  
 214 gray traces. All data are available at <http://weather.uwyo.edu/upperair/sounding.html>.

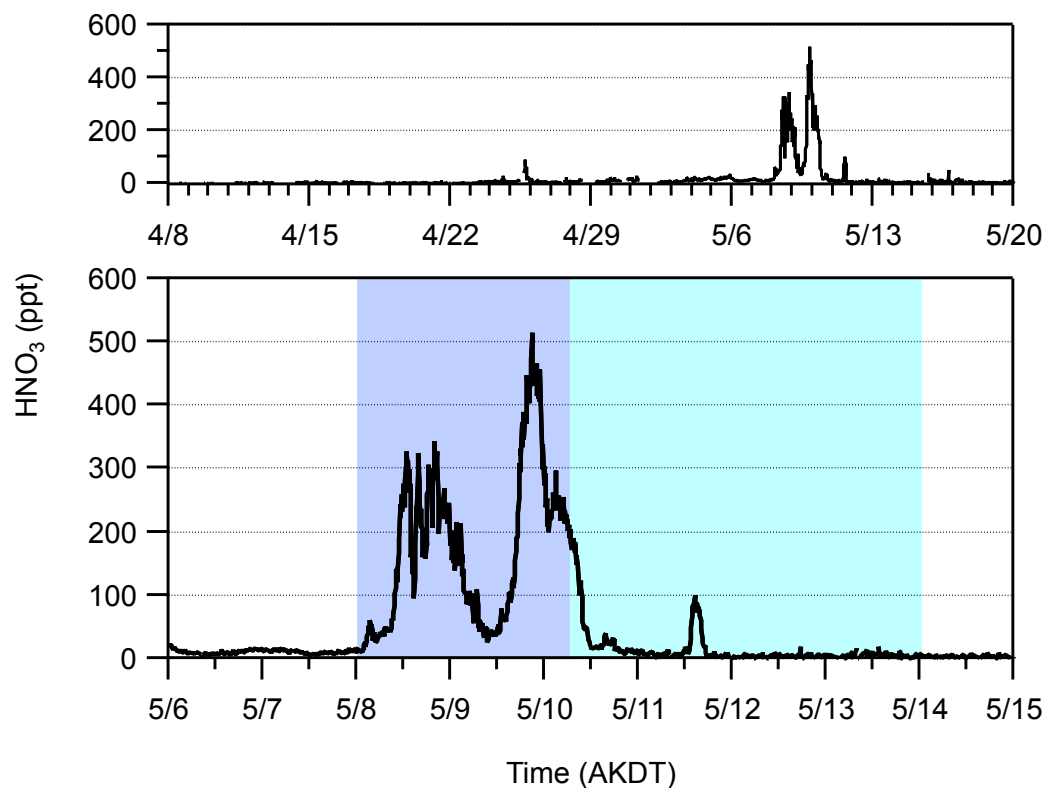

215  
 216 **Figure S12:** 10 min averaged mole ratios of  $\text{HNO}_3$  during (*top panel*) April 8 – May 20 and  
 217 (*bottom panel*) Period III (blue shading), including the period influenced by the North Slope of  
 218 Alaska oilfields (purple shading). The  $\text{HNO}_3$  removal efficiency of the glass wool scrubber during  
 219 backgrounds was 40-60%; therefore, the  $\text{HNO}_3$  mole ratios shown are an underestimate.

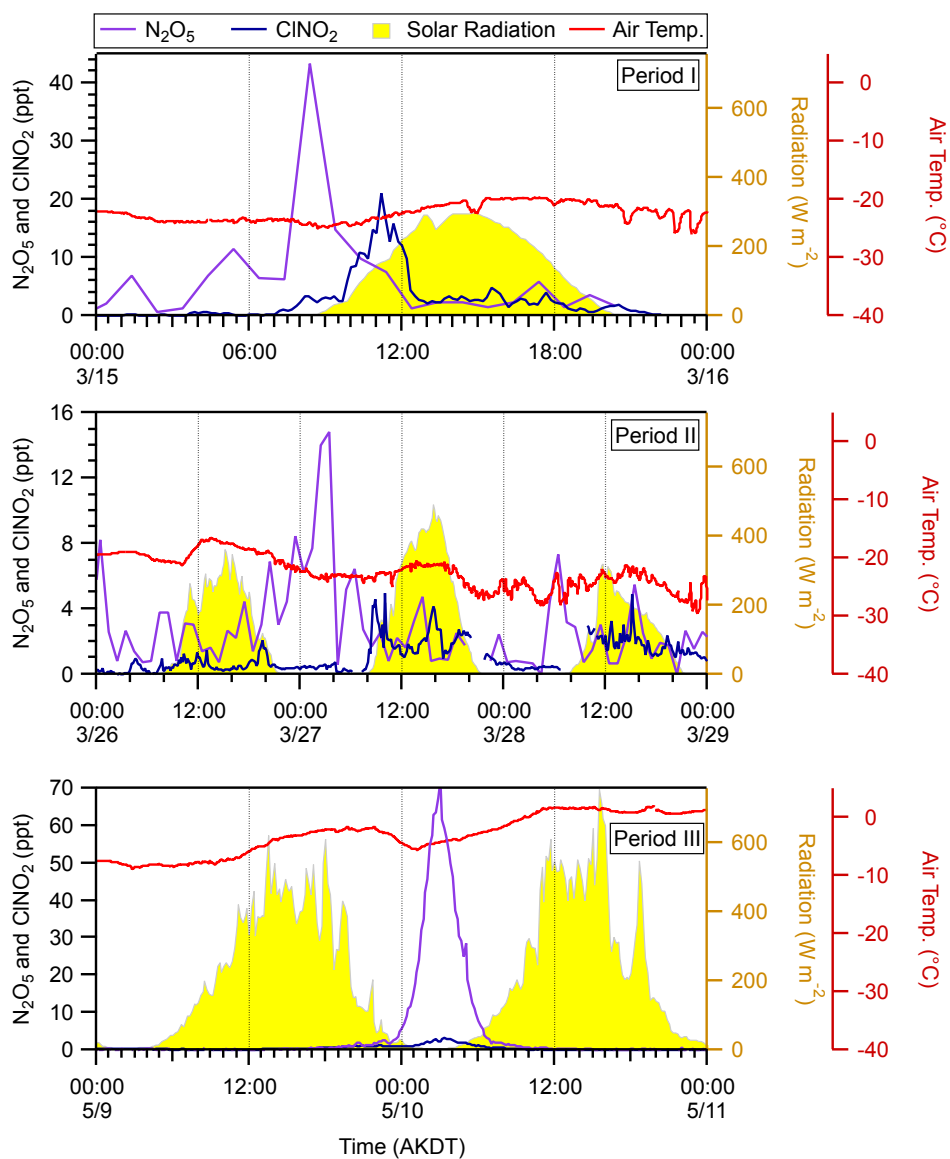

**Figure S13:** Mole ratios of  $\text{N}_2\text{O}_5$  and  $\text{ClNO}_2$  during Period I (*top panel*), Period II (*middle panel*) and Period III (*bottom panel*), shown with measurements of solar radiation and air temperature. All  $\text{ClNO}_2$  mole ratios were 10 min averaged, and  $\text{N}_2\text{O}_5$  mole ratios were hourly mass scans for Periods I and II and 10 min averaged for Period III.

## 227 **References**

- 228 (1) Hönninger, G.; von Friedeburg, C.; Platt, U. Multi Axis Differential Optical Absorption  
229 Spectroscopy (MAX-DOAS). *Atmos. Chem. Phys.* **2004**, *4* (1), 231–254.
- 230 (2) Peterson, P. K.; Simpson, W. R.; Pratt, K. A.; Shepson, P. B.; Frieß, U.; Zielcke, J.; Platt,  
231 U.; Walsh, S. J.; Nghiem, S. V. Dependence of the Vertical Distribution of Bromine  
232 Monoxide in the Lower Troposphere on Meteorological Factors Such as Wind Speed and  
233 Stability. *Atmos. Chem. Phys.* **2015**, *15* (4), 2119–2137.
- 234 (3) Simpson, W. R.; Peterson, P. K.; Frieß, U.; Sihler, H.; Lampel, J.; Platt, U.; Moore, C.;  
235 Pratt, K. A.; Shepson, P. B.; Halfacre, J.; Nghiem, S. V. Horizontal and Vertical Structure  
236 of Reactive Bromine Events Probed by Bromine Monoxide MAX-DOAS. *Atmos. Chem.*  
237 *Phys.* **2017**, *17* (15), 9291–9309.
- 238 (4) Liao, J.; Sihler, H.; Huey, L. G.; Neuman, J. A.; Tanner, D. J.; Friess, U.; Platt, U.;  
239 Flocke, F. M.; Orlando, J. J.; Shepson, P. B.; Beine, H. J.; Weinheimer, A. J.; Sjostedt, S.  
240 J.; Nowak, J. B.; Knapp, D. J.; Staebler, R. M.; Zheng, W.; Sander, R.; Hall, S. R.;  
241 Ullmann, K. A Comparison of Arctic BrO Measurements by Chemical Ionization Mass  
242 Spectrometry and Long Path-Differential Optical Absorption Spectroscopy. *J. Geophys.*  
243 *Res.* **2011**, *116*, D00R02.
- 244 (5) Thaler, R. D.; Mielke, L. H.; Osthoff, H. D. Quantification of Nitryl Chloride at Part per  
245 Trillion Mixing Ratios by Thermal Dissociation Cavity Ring-down Spectroscopy. *Anal.*  
246 *Chem.* **2011**, *83*, 2761–2766.
- 247 (6) Sjostedt, S. J.; Huey, L. G.; Tanner, D. J.; Peischl, J.; Chen, G.; Dibb, J. E.; Lefer, B.;  
248 Hutterli, M. A.; Beyersdorf, A. J.; Blake, N. J.; Blake, D. R.; Sueper, D.; Ryerson, T. B.;  
249 Burkhardt, J.; Stohl, A. Observations of Hydroxyl and the Sum of Peroxy Radicals at  
250 Summit, Greenland during Summer 2003. *Atmos. Environ.* **2007**, *41* (24), 5122–5137.
- 251 (7) Pollack, I. B.; Lerner, B. M.; Ryerson, T. B. Evaluation of Ultraviolet Light-Emitting  
252 Diodes for Detection of Atmospheric NO<sub>2</sub> by Photolysis - Chemiluminescence. *J. Atmos.*  
253 *Chem.* **2010**, *65* (2–3), 111–125.
- 254 (8) Bertram, T. H.; Thornton, J. A.; Riedel, T. P. An Experimental Technique for the Direct  
255 Measurement of N<sub>2</sub>O<sub>5</sub> Reactivity on Ambient Particles. *Atmos. Meas. Tech.* **2009**, *2*,  
256 231–242.
- 257 (9) Custard, K. D.; Pratt, K. A.; Wang, S.; Shepson, P. B. Constraints on Arctic Atmospheric  
258 Chlorine Production through Measurements and Simulations of Cl<sub>2</sub> and ClO. *Environ.*  
259 *Sci. Technol.* **2016**, *50* (22), 12394–12400.
- 260 (10) Huff, A. K.; Abbatt, J. P. D. Gas-Phase Br<sub>2</sub> Production in Heterogeneous Reactions of  
261 Cl<sub>2</sub>, HOCl, and BrCl with Halide-Ice Surfaces. *J. Phys. Chem. A* **2000**, *104* (31), 7284–  
262 7293.
- 263 (11) Appelman, E. H.; Gosztola, D. J. Aqueous Peroxynitric Acid (HOONO<sub>2</sub>): A Novel  
264 Synthesis and Some Chemical and Spectroscopic Properties. *Inorg. Chem.* **1995**, *34* (4),  
265 787–791.
- 266 (12) Bollinger, M. J.; Sievers, R. E.; Fahey, D. W.; Fehsenfeld, F. C. Conversion of Nitrogen  
267 Dioxide, Nitric Acid, and n-Propyl Nitrate to Nitric Oxide by Gold-Catalyzed Reduction  
268 with Carbon Monoxide. *Anal. Chem.* **1983**, *55* (12), 1980–1986.
- 269 (13) Ridley, B. A.; Grahek, F. E. A Small, Low Flow, High Sensitivity Reaction Vessel for NO  
270 Chemiluminescence Detectors. *J. Atmos. Ocean. Technol.* **1990**, *7* (2), 307–311.
- 271 (14) Day, D. A.; Wooldridge, P. J.; Dillon, M. B.; Thornton, J. A.; Cohen, R. C. A Thermal

- 272 Dissociation Laser-Induced Fluorescence Instrument for in Situ Detection of NO<sub>2</sub>, Peroxy  
273 Nitrates, Alkyl Nitrates, and HNO<sub>3</sub>. *J. Geophys. Res. Atmos.* **2002**, *107* (D6), 4046.
- 274 (15) Kolesar, K. R.; Cellini, J.; Peterson, P. K.; Jefferson, A.; Tuch, T.; Birmili, W.;  
275 Wiedensohler, A.; Pratt, K. A. Effect of Prudhoe Bay Emissions on Atmospheric Aerosol  
276 Growth Events Observed in Utqiagvik (Barrow), Alaska. *Atmos. Environ.* **2017**, *152*, 146–  
277 155.
- 278 (16) Liao, J.; Huey, L. G.; Liu, Z.; Tanner, D. J.; Cantrell, C. A.; Orlando, J. J.; Flocke, F. M.;  
279 Shepson, P. B.; Weinheimer, A. J.; Hall, S. R.; Ullmann, K.; Beine, H. J.; Wang, Y.;  
280 Ingall, E. D.; Stephens, C. R.; Hornbrook, R. S.; Apel, E. C.; Riemer, D. D.; Fried, A.;  
281 Mauldin, R. L.; Smith, J. N.; Staebler, R. M.; Neuman, J. A.; Nowak, J. B. High Levels of  
282 Molecular Chlorine in the Arctic Atmosphere. *Nat. Geosci.* **2014**, *7* (2), 91–94.  
283
